# Supplementary material for: A Comparative Study of Standardized Infinity Reference and Average Reference for EEG of Three Typical Brain States
Source: PubMed Central journal article supplement (PMC5859052; doi:10.3389/fnins.2018.00158), 2018-03-13
Supplement: DataSheet1.pdf [file DataSheet1.pdf]

## Supplementary materials

### Figure S1

The small-world characteristics in different states (eyes-open, eyes-closed and music) under different references in high-frequency band situations. **(A)** Beta band. **(B)** Gamma band. 'SW' = small-world characteristics. 'AR' = average reference and 'REST' = reference electrode standardization technique, that is, infinity reference. It can be seen that the SW under eyes-open was much lower than that under eyes-closed and music-listening, while the music-listening state and the eyes-closed state showed no significant difference. The statistical significance can be seen in Figure S4 and Table S1.

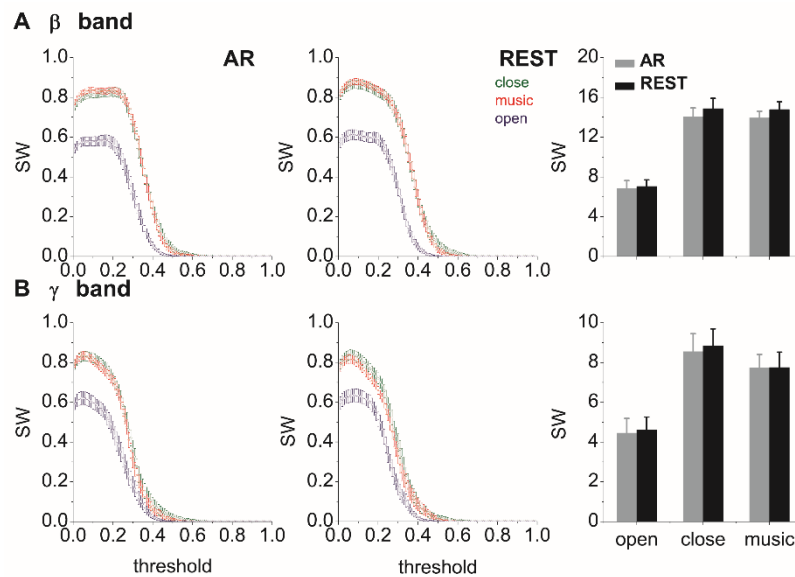

### Figure S2

Global brain functional connectivity density (Global FCD) topography and average of Global FCD under AR and REST reference in high-frequency band situations. **(A)** Beta band. **(B)** Gamma band. It can be seen that there was left frontal brain activity during eyes-open, and the alpha wave disappeared, which also confirmed right-lateralization in the prefrontal region (see Figure 3D). The statistical significance can be seen in Table S2.

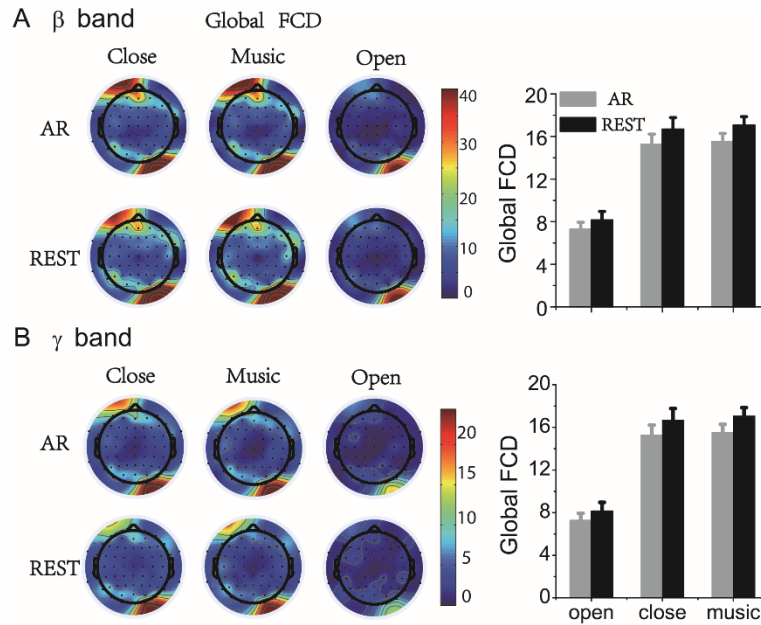

### Figure S3

Local brain functional connectivity density (Local FCD) topography and average of Local FCD under AR and REST reference in high-frequency band situations. **(A)** Beta band. **(B)** Gamma band. The results of Local FCD were almost the same as for Global FCD. The statistical significance can be seen in Table S3.

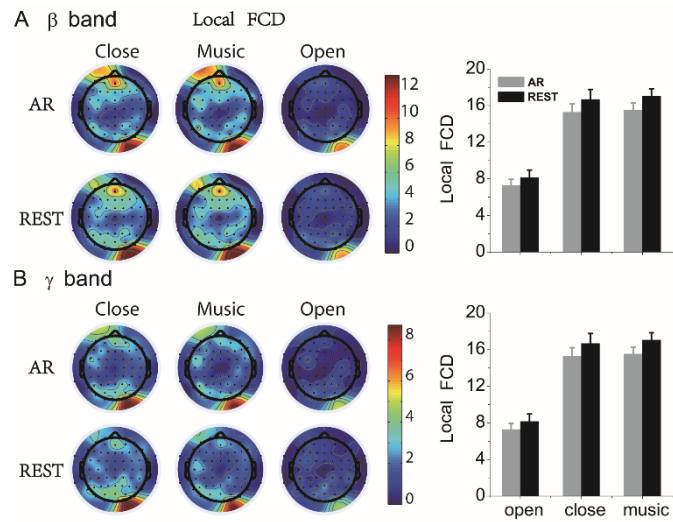

### Figure S4

Statistical significance (Matlab ANOVA toolbox, ANOVA1, multcompare) of small-world characteristics among different states (eyes-open, eyes-closed and music) under REST and AR in all frequency band situations. **(A)** Full band. **(B)** Delta band. **(C)** Theta band. **(D)** Alpha band. **(E)** Beta band. **(F)** Gamma band. A p value < 0.05 indicates significant difference between different states. The difference between eyes-closed and eyes-open is significant in full, alpha, beta and gamma frequency bands. The difference between music-listening and eyes-open is significant in full, alpha, beta and gamma frequency bands, and in theta band under REST. There are no significant differences between music-listening and eyes-closed in all bands.

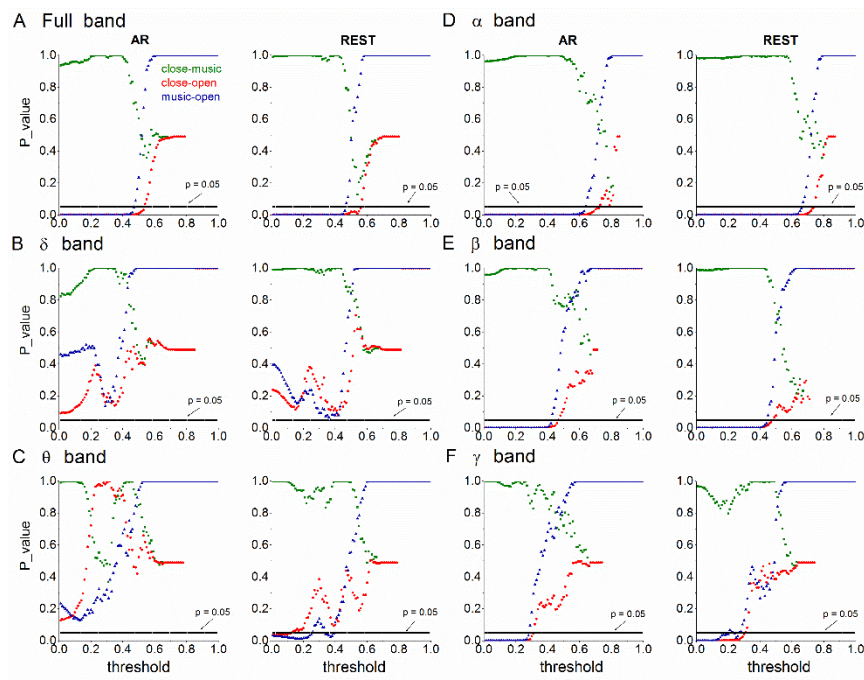

**Table S1**

Statistical significance (Matlab ANOVA toolbox, ANOVA1, multcompare) of the sum of the small-world effect in the threshold range from 0.2 to 0.5 among different states under REST and AR. The asterisk '\*' represents p value < 0.05, which indicates significant difference, and the double asterisk '\*\*' represents p value < 0.01, which indicates a greater significant difference.

|      |       | Closed - Music | Closed - Open   | Music - Open    |
|------|-------|----------------|-----------------|-----------------|
| AR   | Full  | 0.7812         | 9.0047e-07 (**) | 2.4866e-10 (**) |
|      | Delta | 0.6148         | 0.0806          | 0.0157 (*)      |
|      | Theta | 0.3285         | 0.3899          | 0.0095 (**)     |
|      | Alpha | 0.8216         | 2.0544e-08 (**) | 5.4648e-11 (**) |
|      | Beta  | 0.7463         | 3.2482e-06 (**) | 3.3617e-08 (**) |
|      | Gamma | 0.2581         | 0.0043 (**)     | 0.0037 (**)     |
| REST | Full  | 0.9917         | 4.1202e-06 (**) | 1.2637e-07 (**) |
|      | Delta | 0.9400         | 0.0292 (*)      | 9.6085e-04 (**) |
|      | Theta | 0.5526         | 0.0119 (*)      | 1.6227e-04 (**) |
|      | Alpha | 0.8965         | 4.4093e-09 (**) | 2.6028e-12 (**) |
|      | Beta  | 0.7761         | 3.7352e-07 (**) | 2.5988e-09 (**) |
|      | Gamma | 0.4966         | 0.0019 (**)     | 0.0025 (**)     |

**Table S2**

Statistical significance (Matlab ANOVA toolbox, ANOVA1, multcompare) of the average of the global functional connectivity density (GFCD) among different states under REST and AR. The asterisk '\*' represents p value < 0.05, which indicates significant difference, and the double asterisk '\*\*' represents p value < 0.01, which indicates a greater significant difference.

|      |       | Close - Music | Close - Open    | Music - Open    |
|------|-------|---------------|-----------------|-----------------|
| AR   | Full  | 0.9211        | 3.7796e-09 (**) | 4.7093e-09 (**) |
|      | Delta | 0.7813        | 0.0193 (*)      | 0.2030          |
|      | Theta | 0.9338        | 0.0668          | 0.2444          |
|      | Alpha | 0.9696        | 3.7732e-09 (**) | 3.8959e-09 (**) |
|      | Beta  | 0.9999        | 2.6659e-06 (**) | 1.8475e-06 (**) |
|      | Gamma | 0.9869        | 0.0038 (**)     | 0.0118 (*)      |
| REST | Full  | 0.9992        | 4.3532e-09 (**) | 5.1554e-09 (**) |
|      | Delta | 0.9326        | 0.0213 (*)      | 0.1043          |
|      | Theta | 1.0000        | 0.0304 (*)      | 0.0345 (*)      |
|      | Alpha | 0.9963        | 3.7685e-09 (**) | 3.7698e-09 (**) |
|      | Beta  | 0.9979        | 2.1458e-07 (**) | 7.7813e-08 (**) |
|      | Gamma | 0.8659        | 6.6713e-04 (**) | 0.0111 (*)      |

**Table S3**

Statistical significance (Matlab ANOVA toolbox, ANOVA1, multcompare) of the average of the local functional connectivity density (LFCD) among different states under REST and AR. The asterisk '\*' represents p value < 0.05, which indicates significant difference, and the double asterisk '\*\*' represents p value < 0.01, which indicates a greater significant difference.

|      |       | Close - Music | Close - Open    | Music - Open    |
|------|-------|---------------|-----------------|-----------------|
| AR   | Full  | 0.9062        | 3.7717e-09 (**) | 4.1987e-09 (**) |
|      | Delta | 0.7178        | 0.0164 (*)      | 0.2267          |
|      | Theta | 0.9287        | 0.0377 (*)      | 0.1658          |
|      | Alpha | 0.9802        | 3.7717e-09 (**) | 3.8269e-09 (**) |
|      | Beta  | 0.9926        | 1.4937e-06 (**) | 3.3231e-07 (**) |
|      | Gamma | 0.9623        | 0.0056 (**)     | 0.0261 (*)      |
| REST | Full  | 0.9972        | 4.8748e-09 (**) | 7.7770e-09 (**) |
|      | Delta | 0.7900        | 0.0310 (*)      | 0.2663          |
|      | Theta | 0.9991        | 0.0336 (*)      | 0.0226 (*)      |
|      | Alpha | 0.9999        | 3.7683e-09 (**) | 3.7684e-09 (**) |
|      | Beta  | 0.9984        | 2.3727e-07 (**) | 9.4549e-08 (**) |
|      | Gamma | 0.6538        | 0.0013 (**)     | 0.0550          |
